# Supplementary material for: Tea Tree Oil Improves Energy Metabolism, Non-Specific Immunity, and Microbiota Diversity via the Intestine–Hepatopancreas Axis in Macrobrachium rosenbergii under Low Fish Meal Diet Administration
Source: MDPI journal article supplement (doi:10.3390/antiox12101879), 2023-10-19
Supplement: s1 [file s1]

**Table S1.** The formulation and proximate composition of the experimental diet

| Ingredients (g)                    | NF      | LF      | LFT     |
|------------------------------------|---------|---------|---------|
| Fish meal <sup>1</sup>             | 250.00  | 150.00  | 150.00  |
| Soybean meal <sup>1</sup>          | 190.00  | 290.00  | 290.00  |
| Chellocken meal <sup>1</sup>       | 30.00   | 30.00   | 30.00   |
| Blood globulin powder <sup>1</sup> | 20.00   | 20.00   | 20.00   |
| Squid extract <sup>1</sup>         | 30.00   | 30.00   | 30.00   |
| Shrimp meal <sup>1</sup>           | 40.00   | 40.00   | 40.00   |
| Repeseed meal <sup>2</sup>         | 155.00  | 155.00  | 155.00  |
| $\alpha$ -starch <sup>1</sup>      | 165.00  | 165.00  | 165.00  |
| Soybean oil <sup>2</sup>           | 10.00   | 10.00   | 10.00   |
| Soy lecithin oil <sup>1</sup>      | 10.00   | 10.00   | 10.00   |
| Cholesterol <sup>4</sup>           | 3.00    | 3.00    | 3.00    |
| Ecdysone <sup>1</sup>              | 0.10    | 0.10    | 0.10    |
| MCP                                | 20.00   | 20.00   | 20.00   |
| Premix <sup>3</sup>                | 10.00   | 10.00   | 10.00   |
| Choline chloride <sup>4</sup>      | 10.00   | 10.00   | 10.00   |
| Bentonite <sup>4</sup>             | 6.90    | 6.90    | 4.90    |
| Carboxymethocel                    | 50.00   | 50.00   | 50.00   |
| Tea Tree Oil(10%)                  | 0.00    | 0.00    | 2.00    |
| Total                              | 1000.00 | 1000.00 | 1000.00 |
| Proximate analysis (%)             |         |         |         |
| Moisture                           | 10.05   | 10.74   | 10.33   |
| Crude protein                      | 38.28   | 37.83   | 37.91   |
| Crude lipid                        | 9.64    | 9.21    | 9.16    |
| Ash                                | 10.67   | 10.81   | 10.47   |

<sup>1</sup>Obtained from Jiangsu Fuyuda Food Products Co., Ltd., Yangzhou, China;

<sup>2</sup>Obtained from Hulunbeier Sanyuan Milk Co., Ltd., Inner Mongolia, China;

<sup>3</sup>Premix supplied the following minerals (g kg<sup>-1</sup>) and vitamins (IU or mg kg<sup>-1</sup>): CuSO<sub>4</sub>·5H<sub>2</sub>O, 2.0 g; FeSO<sub>4</sub>·7H<sub>2</sub>O, 25 g; ZnSO<sub>4</sub>·7H<sub>2</sub>O, 22 g; MnSO<sub>4</sub>·4H<sub>2</sub>O, 7 g; Na<sub>2</sub>SeO<sub>3</sub>, 0.04 g; KI, 0.026 g; CoCl<sub>2</sub>·6H<sub>2</sub>O, 0.1 g; Vitamin A, 900,000 IU; Vitamin D, 200,000 IU; Vitamin E, 4500 mg; Vitamin K<sub>3</sub>, 220 mg; Vitamin B<sub>1</sub>, 320 mg; Vitamin B<sub>2</sub>, 1090 mg; Vitamin B<sub>5</sub>, 2000 mg; Vitamin B<sub>6</sub>, 500 mg; Vitamin B<sub>12</sub>, 1.6 mg; Vitamin C, 5000 mg; Pantothenate, 1000 mg; Folic acid, 165 mg. Vitamin and mineral additives were provided by Wuxi Hanove Animal Health Products Co., Ltd.

<sup>4</sup>Obtained from Freshwater Fisheries Research Center, Chinese Academy of Fishery Sciences.

**Table S2.** Basic growth indicators

| Index                            | Groups    |           |           |
|----------------------------------|-----------|-----------|-----------|
|                                  | NF        | LF        | LFT       |
| Initial weight (g)               | 0.28±0.01 | 0.28±0.01 | 0.29±0.01 |
| Final weight (g)                 | 3.91±0.17 | 3.43±0.43 | 3.90±0.46 |
| Hepatopancreas weight (g)        | 0.41±0.04 | 0.24±0.02 | 0.38±0.03 |
| Dry feed intake (g / per shrimp) | 9.37±0.08 | 9.13±0.17 | 9.21±0.14 |

**Table S3.** qPCR primer

| Gene             | Primer | Sequences (5'-3')      | Accession number |
|------------------|--------|------------------------|------------------|
| <i>β-actin</i>   | F      | TCCGTAAGGACCTGTATGCC   | AY651918.2       |
|                  | R      | TCGGGAGGTGCGATGATTTT   |                  |
| <i>BCL-2</i>     | F      | GTATAAAGTGCGTTCGCCCC   | OR602687         |
|                  | R      | AATGACGTGGTCGTGGAAGT   |                  |
| <i>Bax</i>       | F      | GTTTCGCCCCTCTGCTCAATA  | OR602688         |
|                  | R      | CAGTCTTTCATGTGCGGCG    |                  |
| <i>Caspase-2</i> | F      | ACCTGGTTACTATTACGC     | OR602689         |
|                  | R      | TAAGATCATATTTTGGGC     |                  |
| <i>Caspase-3</i> | F      | AGGGGATAAAACCGATGGAG   | KF878972.1       |
|                  | R      | CCCACATGACGAGCATATCA   |                  |
| <i>Caspase-8</i> | F      | CACGGCAAAACTGGAGGAG    | OR602691         |
|                  | R      | CGGCGAGAATCAAAAGACA    |                  |
| <i>Akt</i>       | F      | GGTCCAAACATGCTCAACCAA  | OR602692         |
|                  | R      | AGGTGTTCCCTACTTTCATTGC |                  |
| <i>mTOR</i>      | F      | GAGACTTCTGCCACGACGAA   | OR602693         |
|                  | R      | CAAAACGGGCACCAACCAAT   |                  |
| <i>Ampk</i>      | F      | TGAAAGGGCGCTAAGTGGAG   | OR602694         |
|                  | R      | ACTCGCACATGGAAAGGGTT   |                  |
| <i>IGF-1</i>     | F      | AATAAAAACGGTGACAGAG    | OR602695         |
|                  | R      | TGGAAATTCAAATAATGAG    |                  |
| <i>IGF-2</i>     | F      | CCCCCTTTGTTTGTGTTTT    | OR602696         |
|                  | R      | AGCTCGGGTAGATGTGCAT    |                  |
| <i>Toll</i>      | F      | TCAGTAGCGACACCATGCAG   | KX610955.1       |
|                  | R      | CGAGCCTTCGAGGAACACTT   |                  |
| <i>Drosal</i>    | F      | TCAGTAGCGACACCATGCAG   | KX219631.1       |
|                  | R      | CGAGCCTTCGAGGAACACTT   |                  |
| <i>IMD</i>       | F      | CGACCACATTCTCCTCCTCCC  | OR602697         |
|                  | R      | TTCAGTGCATCCACGTCCCTC  |                  |
| <i>Relish</i>    | F      | GATGAGCCTTCAGTGCCAGA   | KR827675.1       |
|                  | R      | CCAGGTGACGCCATGTATCA   |                  |
| <i>CRU</i>       | F      | GCAGGTGACGGTTGAGGA     | OR602698         |
|                  | R      | ATGCGACTGACTGGTGGA     |                  |
| <i>ALF</i>       | F      | GGAAGGCAGACATTGGACC    | OR602699         |
|                  | R      | GCAGACGCAGAAGGAAGG     |                  |
| <i>LZM</i>       | F      | CCGTCATCTTCGCCTTGGTT   | OR602700         |
|                  | R      | TGCCTGTTTGGGTCATCGTTC  |                  |

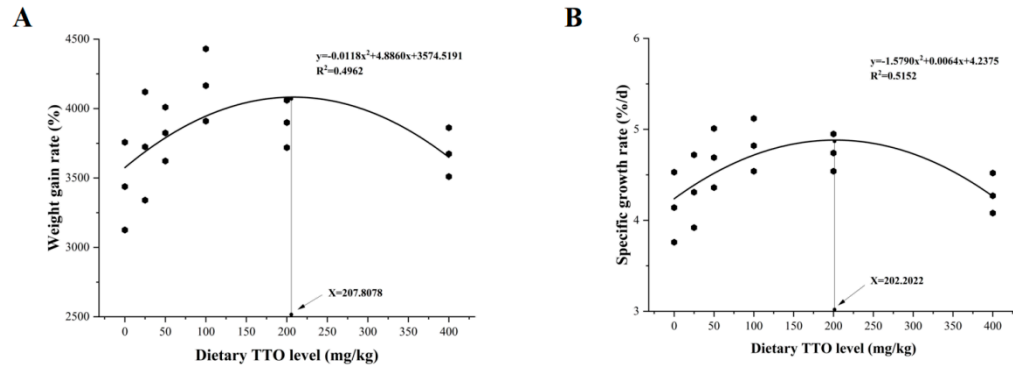

**Figure S1.** The optimum level of TTO supplementation based on second order polynomial analysis on (A) weight gain rate (WGR) and (B) specific growth rate (SGR) of *M. rosenbergii*. Note: Data are mean values of 3 replicates expressed as mean  $\pm$  SEM.

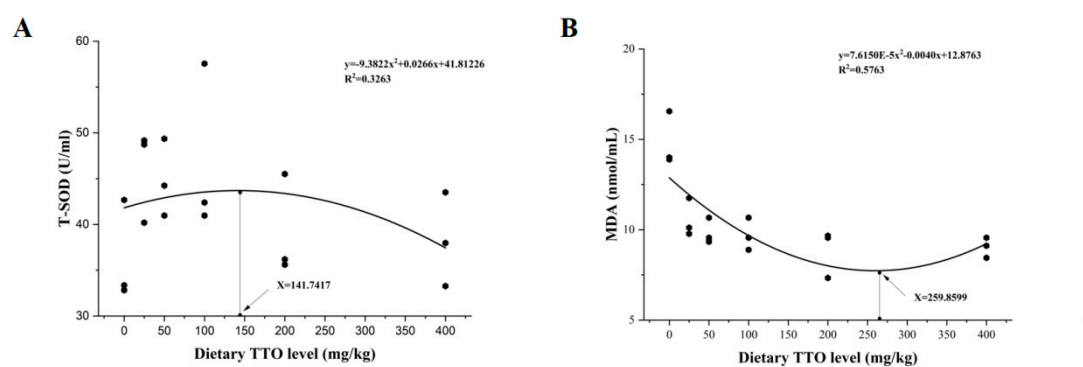

**Figure S2.** The optimum level of TTO supplementation based on second order polynomial analysis on antioxidant indicators of *M. rosenbergii*. (A) Total superoxide dismutase (SOD); (B) Malondialdehyde (MDA). Note: Data are mean values of 3 replicates expressed as mean  $\pm$  SEM.

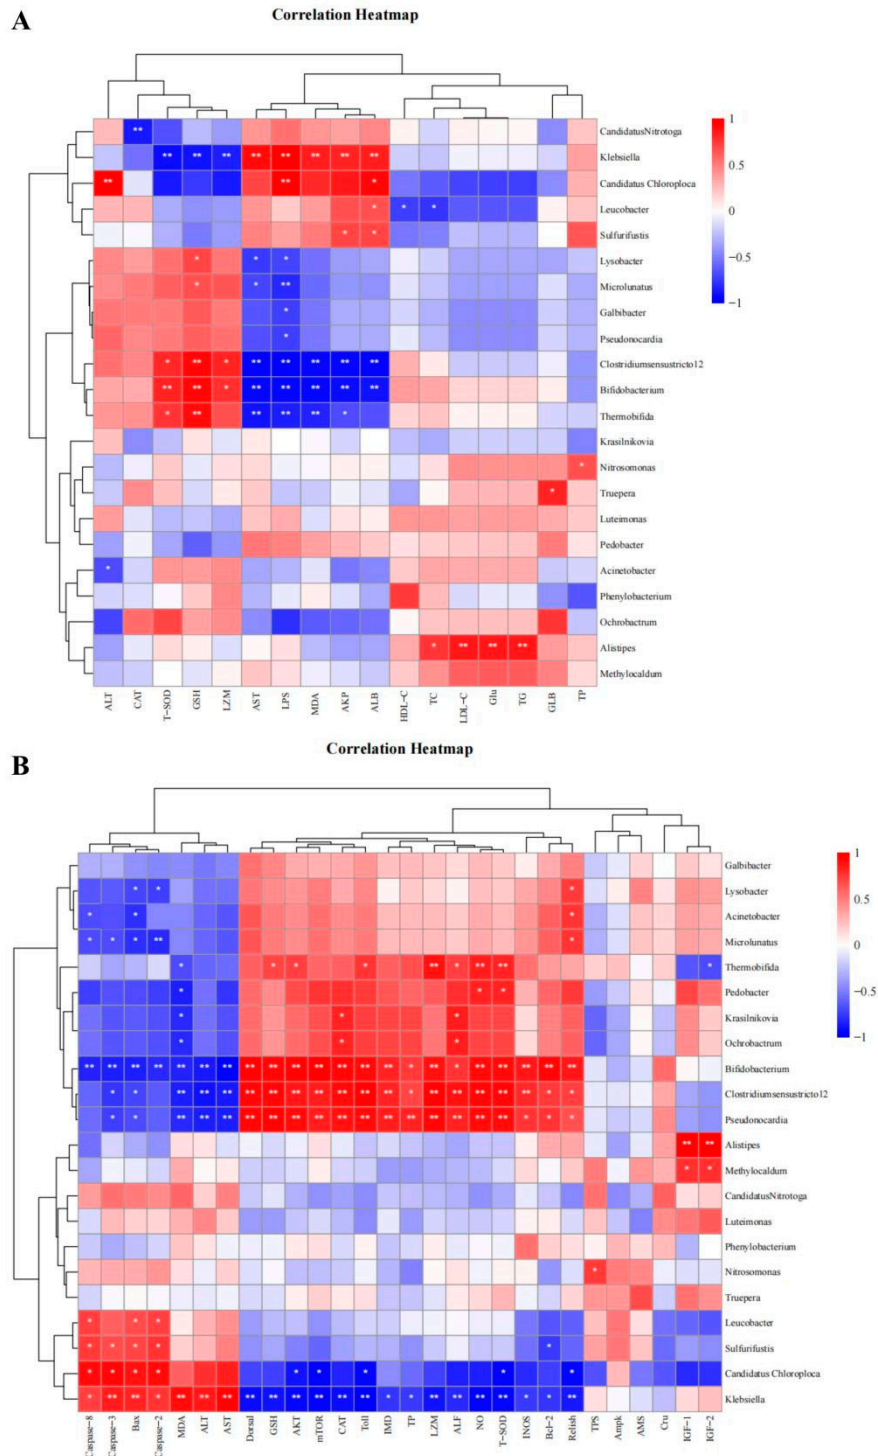

**Figure S3.** Correlation of hemolymph and hepatopancreas measures with intestinal microbial genera. (A) Heatmaps of hemolymph parameters and microbiota genera abundance; (B) Heatmaps of hepatopancreas indicators and microbiota genera abundance. Red represents a positive correlation; blue represents a negative-positive correlation.  $*p < 0.05$ ,  $**p < 0.01$ .
